# Supplementary material for: Effects of Proteases from Pineapple and Papaya on Protein Digestive Capacity and Gut Microbiota in Healthy C57BL/6 Mice and Dose-Manner Response on Mucosal Permeability in Human Reconstructed Intestinal 3D Tissue Model
Source: MDPI journal article supplement (doi:10.3390/metabo12111027), 2022-10-26
Supplement: s1 [file s1]

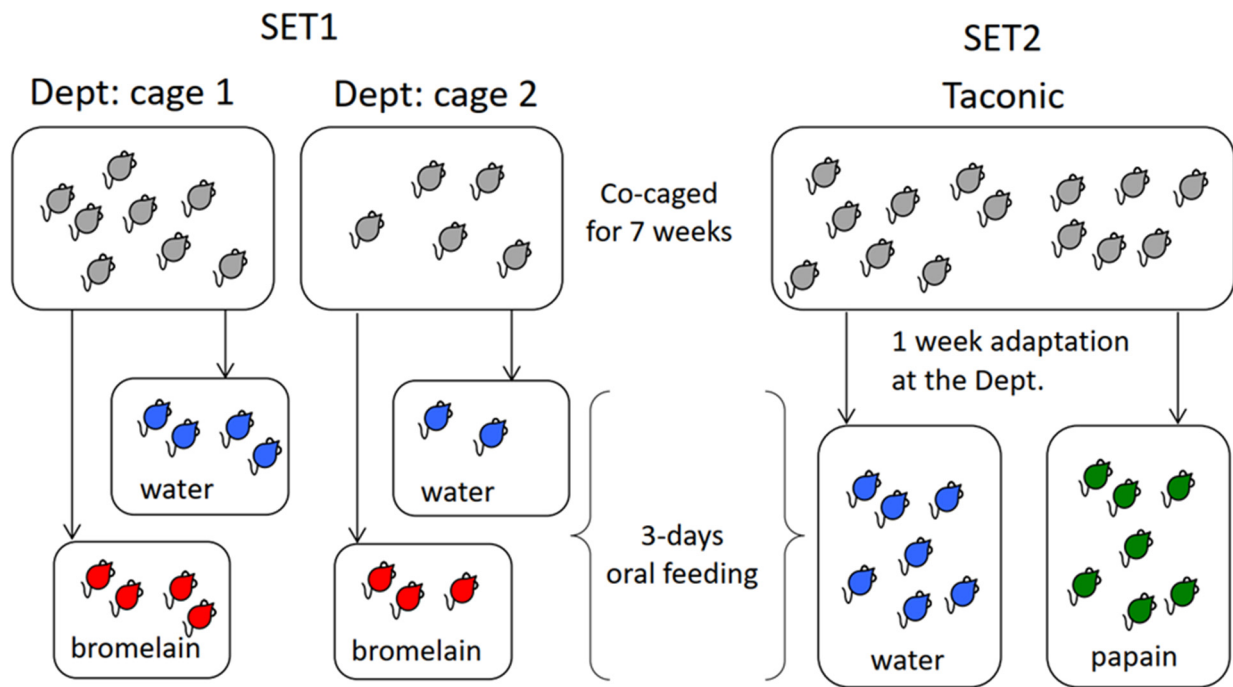

**Figure S1.** Experimental design of the animal study. In the current study, two different sets of animals were used. SET1 – water  $n = 6$ , bromelain  $n = 7$  were primarily obtained from Taconic A/S, Denmark and bred in the Dept. of Biology, Lund University under specific pathogen-free conditions; SET2 – water  $n = 7$ , papain  $n = 7$  were purchased directly from Taconic. During three consecutive days, animals had oral feeding, control groups with water and experimental groups with plant proteases.
