# Supplementary figures and images for: Effects of Proteases from Pineapple and Papaya on Protein Digestive Capacity and Gut Microbiota in Healthy C57BL/6 Mice and Dose-Manner Response on Mucosal Permeability in Human Reconstructed Intestinal 3D Tissue Model
Source: MDPI journal article supplement (doi:10.3390/metabo12111027), 2022-10-26

A

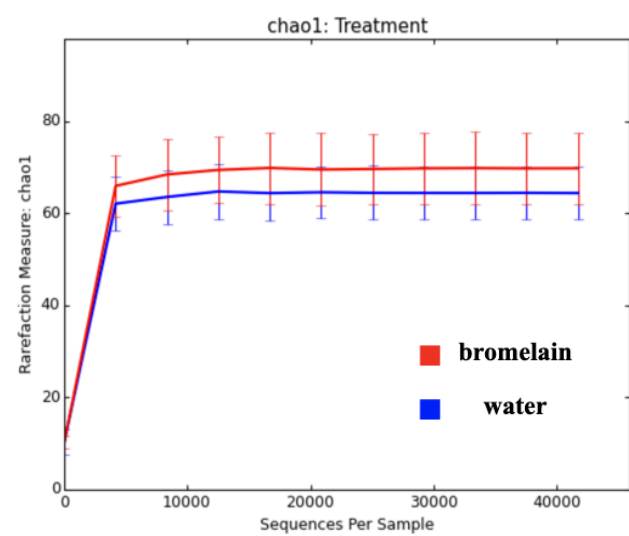

Bromelain Experiment

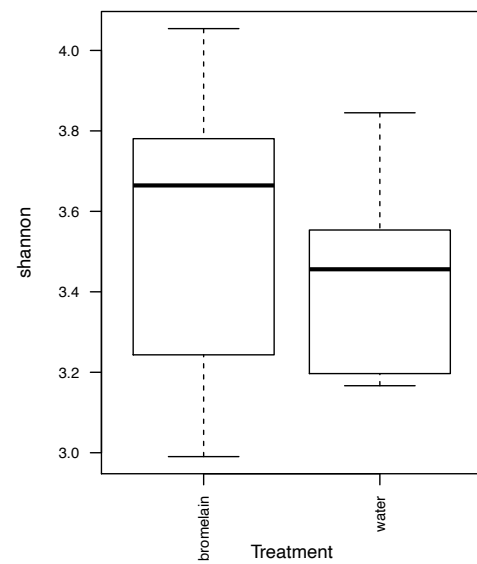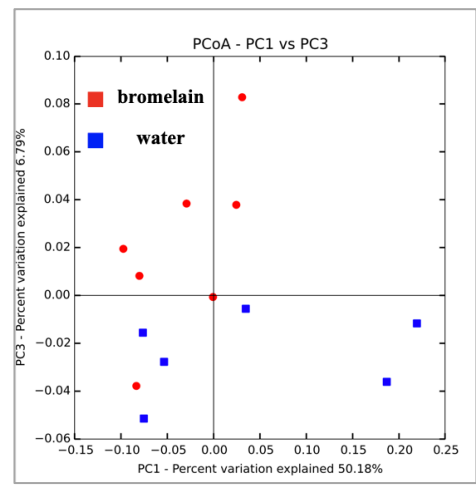

B

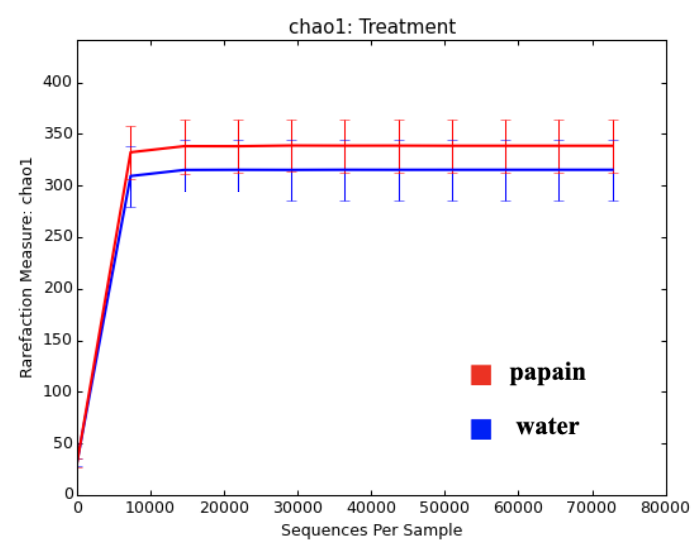

Papain Experiment

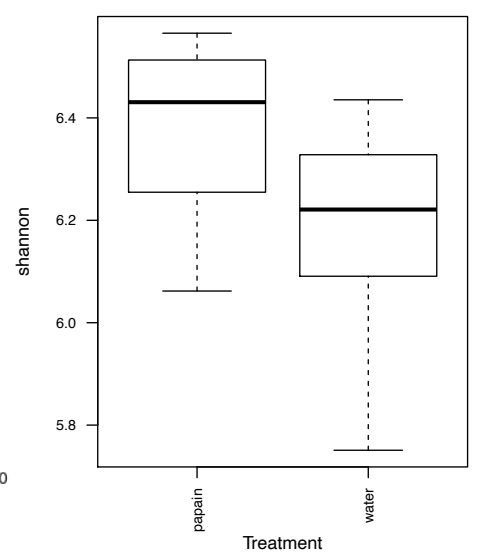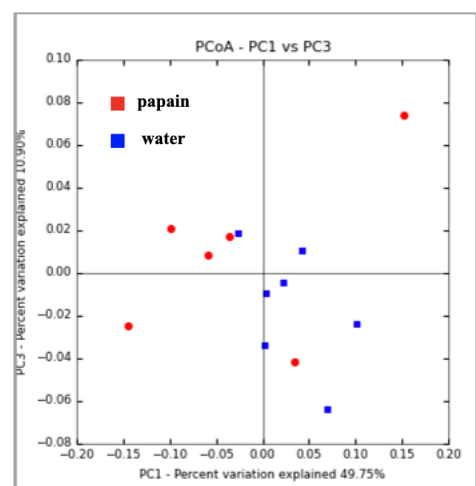

Supplement: s1 [file s1]
